# Supplementary material for: Immunotherapy beyond progression in patients with advanced non-small cell lung cancer
Source: PubMed Central journal article supplement — Transl Lung Cancer Res. 2020 Dec;9(6):2391–400. doi: 10.21037/tlcr-20-1252 (PMC7815351; doi:10.21037/tlcr-20-1252), 2020-12
Supplement: tlcr-09-06-2391-supplementary.pdf [file tlcr-09-06-2391-supplementary.pdf]

**Table S1** Summary of baseline characteristics of all patients

| Characteristics                | Type   | Before weighting    |                | After weighting     |                |
|--------------------------------|--------|---------------------|----------------|---------------------|----------------|
|                                |        | Standard Mean Diff. | Variance Ratio | Standard Mean Diff. | Variance Ratio |
| Age                            | Contin | 0.184               | 1.246          | 0.000               | 1.247          |
| Sex                            |        |                     |                |                     |                |
| Male                           | Binary | -0.023              |                | 0.000               |                |
| Female                         | Binary | 0.023               |                | 0.000               |                |
| Histology                      |        |                     |                |                     |                |
| Squamous                       | Binary | -0.087              |                | 0.000               |                |
| Non-squamous                   | Binary | 0.087               |                | 0.000               |                |
| Smoking history                |        |                     |                |                     |                |
| Yes                            | Binary | 0.015               |                | 0.000               |                |
| No                             | Binary | -0.015              |                | 0.000               |                |
| ECOG PS                        |        |                     |                |                     |                |
| 0-1                            | Binary | -0.121              |                | 0.000               |                |
| ≥2                             | Binary | 0.121               |                | 0.000               |                |
| Liver metastases               |        |                     |                |                     |                |
| Yes                            | Binary | 0.081               |                | 0.000               |                |
| No                             | Binary | -0.081              |                | 0.000               |                |
| Brain metastases               |        |                     |                |                     |                |
| Yes                            | Binary | 0.069               |                | 0.000               |                |
| No                             | Binary | -0.069              |                | 0.000               |                |
| Gene mutation                  |        |                     |                |                     |                |
| Yes                            | Binary | 0.062               |                | 0.000               |                |
| No                             | Binary | -0.215              |                | 0.000               |                |
| Unknown                        | Binary | 0.153               |                | 0.000               |                |
| Tumor stage                    |        |                     |                |                     |                |
| IIIB                           | Binary | 0.095               |                | 0.000               |                |
| IV                             | Binary | -0.095              |                | 0.000               |                |
| Previous lines of therapy      |        |                     |                |                     |                |
| 1                              | Binary | -0.064              |                | 0.00                |                |
| 2                              | Binary | 0.144               |                | 0.00                |                |
| ≥3                             | Binary | -0.080              |                | 0.000               |                |
| Best response to previous line |        |                     |                |                     |                |
| PR                             | Binary | -0.168              |                | 0.000               |                |
| SD                             | Binary | 0.048               |                | 0.000               |                |
| PD                             | Binary | 0.120               |                | 0.000               |                |
| Initial immunotherapy regimen  |        |                     |                |                     |                |
| Monotherapy                    | Binary | 0.192               |                | 0.000               |                |
| Combination                    | Binary | -0.192              |                | 0.000               |                |

Contin: continuous variable; Binary: binary variable; ECOG PS, Eastern Cooperative Oncology Group Performance Status; PR, partial response; SD, stable disease; PD, progressive disease.

**Table S2** Summary of the baseline characteristics of patients in the initial immune monotherapy subgroup

| Characteristics                | Type   | Before balancing    |                | After balancing     |                |
|--------------------------------|--------|---------------------|----------------|---------------------|----------------|
|                                |        | Standard Mean Diff. | Variance Ratio | Standard Mean Diff. | Variance Ratio |
| Age                            | Contin | -0.287              | 1.812          | -0.094              | 1.607          |
| Sex                            |        |                     |                |                     |                |
| Male                           | Binary | 0.019               |                | 0.006               |                |
| Female                         | Binary | -0.019              |                | -0.006              |                |
| Histology                      |        |                     |                |                     |                |
| Squamous                       | Binary | -0.285              |                | -0.094              |                |
| Non-squamous                   | Binary | 0.285               |                | 0.094               |                |
| Smoking history                |        |                     |                |                     |                |
| Yes                            | Binary | -0.198              |                | -0.065              |                |
| No                             | Binary | 0.198               |                | 0.065               |                |
| ECOG PS                        |        |                     |                |                     |                |
| 0-1                            | Binary | 0.172               |                | 0.056               |                |
| ≥ 2                            | Binary | -0.172              |                | -0.056              |                |
| Liver metastases               |        |                     |                |                     |                |
| Yes                            | Binary | 0.004               |                | 0.002               |                |
| No                             | Binary | -0.004              |                | -0.002              |                |
| Brain metastases               |        |                     |                |                     |                |
| Yes                            | Binary | -0.182              |                | -0.059              |                |
| No                             | Binary | 0.182               |                | 0.059               |                |
| Gene mutation                  |        |                     |                |                     |                |
| Yes                            | Binary | -0.019              |                | -0.006              |                |
| No                             | Binary | 0.411               |                | 0.133               |                |
| Unknown                        | Binary | -0.391              |                | -0.127              |                |
| Tumor stages                   |        |                     |                |                     |                |
| IIIB                           | Binary | -0.279              |                | -0.092              |                |
| IV                             | Binary | 0.279               |                | 0.092               |                |
| Previous lines of therapy      |        |                     |                |                     |                |
| 1                              | Binary | -0.033              |                | -0.010              |                |
| 2                              | Binary | -0.072              |                | -0.024              |                |
| ≥3                             | Binary | 0.105               |                | 0.034               |                |
| Best response to previous line |        |                     |                |                     |                |
| PR                             | Binary | 0.157               |                | 0.050               |                |
| SD                             | Binary | -0.112              |                | -0.038              |                |
| PD                             | Binary | -0.045              |                | -0.013              |                |

Contin: continuous variable; Binary: binary variable; ECOG PS, Eastern Cooperative Oncology Group Performance Status; PR, partial response; SD, stable disease; PD, progressive disease.

**Table S3** Summary of the baseline characteristics of patients in the initial immune combination therapy subgroup

| Characteristics                | Type   | Before balancing    |                | After balancing     |                |
|--------------------------------|--------|---------------------|----------------|---------------------|----------------|
|                                |        | Standard Mean Diff. | Variance Ratio | Standard Mean Diff. | Variance Ratio |
| Age                            | Contin | 0.073               | 0.997          | 0.031               | 0.765          |
| Sex                            |        |                     |                |                     |                |
| Male                           | Binary | -0.076              |                | -0.030              |                |
| Female                         | Binary | 0.076               |                | 0.030               |                |
| Histology                      |        |                     |                |                     |                |
| Squamous                       | Binary | -0.356              |                | -0.143              |                |
| Non-squamous                   | Binary | 0.356               |                | 0.143               |                |
| Smoking history                |        |                     |                |                     |                |
| Yes                            | Binary | -0.118              |                | -0.046              |                |
| No                             | Binary | 0.118               |                | 0.046               |                |
| ECOG PS                        |        |                     |                |                     |                |
| 0-1                            | Binary | -0.065              |                | -0.026              |                |
| ≥2                             | Binary | 0.065               |                | 0.026               |                |
| Liver metastases               |        |                     |                |                     |                |
| Yes                            | Binary | 0.145               |                | 0.057               |                |
| No                             | Binary | -0.145              |                | -0.057              |                |
| Brain metastases               |        |                     |                |                     |                |
| Yes                            | Binary | 0.006               |                | 0.002               |                |
| No                             | Binary | -0.006              |                | -0.002              |                |
| Gene mutation                  |        |                     |                |                     |                |
| Yes                            | Binary | 0.127               |                | 0.050               |                |
| No                             | Binary | -0.077              |                | -0.031              |                |
| Unknown                        | Binary | -0.050              |                | -0.019              |                |
| Tumor stages                   |        |                     |                |                     |                |
| IIIB                           | Binary | -0.032              |                | -0.012              |                |
| IV                             | Binary | 0.032               |                | 0.012               |                |
| Previous lines of therapy      |        |                     |                |                     |                |
| 1                              | Binary | -0.035              |                | -0.012              |                |
| 2                              | Binary | 0.098               |                | 0.039               |                |
| ≥3                             | Binary | -0.063              |                | -0.027              |                |
| Best response to previous line |        |                     |                |                     |                |
| PR                             | Binary | -0.147              |                | -0.059              |                |
| SD                             | Binary | 0.090               |                | 0.036               |                |
| PD                             | Binary | 0.057               |                | 0.023               |                |

Contin: continuous variable; Binary: binary variable; ECOG PS, Eastern Cooperative Oncology Group Performance Status; PR, partial response; SD, stable disease; PD, progressive disease.

**Table S4** Summary of the baseline characteristics of patients who had non-PR (SD/PD) as their best response to previous line

| Characteristics               | Type   | Before balancing    |                | After balancing     |                |
|-------------------------------|--------|---------------------|----------------|---------------------|----------------|
|                               |        | Standard Mean Diff. | Variance Ratio | Standard Mean Diff. | Variance Ratio |
| Age                           | Contin | 0.148               | 1.569          | 0.032               | 1.409          |
| Sex                           |        |                     |                |                     |                |
| Male                          | Binary | -0.048              |                | -0.009              |                |
| Female                        | Binary | 0.048               |                | 0.009               |                |
| Histology                     |        |                     |                |                     |                |
| Squamous                      | Binary | -0.029              |                | -0.006              |                |
| Non-squamous                  | Binary | 0.029               |                | 0.006               |                |
| Smoking history               |        |                     |                |                     |                |
| Yes                           | Binary | -0.022              |                | -0.004              |                |
| No                            | Binary | 0.022               |                | 0.004               |                |
| ECOG PS                       |        |                     |                |                     |                |
| 0-1                           | Binary | -0.115              |                | -0.024              |                |
| ≥2                            | Binary | 0.115               |                | 0.024               |                |
| Liver metastases              |        |                     |                |                     |                |
| Yes                           | Binary | 0.092               |                | 0.018               |                |
| No                            | Binary | -0.092              |                | -0.018              |                |
| Brain metastases              |        |                     |                |                     |                |
| Yes                           | Binary | -0.023              |                | -0.005              |                |
| No                            | Binary | 0.023               |                | 0.005               |                |
| Gene mutation                 |        |                     |                |                     |                |
| Yes                           | Binary | 0.021               |                | 0.006               |                |
| No                            | Binary | 0.197               |                | 0.041               |                |
| Unknown                       | Binary | -0.218              |                | -0.047              |                |
| Tumor stages                  |        |                     |                |                     |                |
| IIIB                          | Binary | 0.156               |                | 0.032               |                |
| IV                            | Binary | -0.156              |                | -0.032              |                |
| Previous lines of therapy     |        |                     |                |                     |                |
| 1                             | Binary | 0.058               |                | 0.013               |                |
| 2                             | Binary | 0.193               |                | 0.040               |                |
| ≥3                            | Binary | -0.251              |                | -0.053              |                |
| Initial immunotherapy regimen |        |                     |                |                     |                |
| Monotherapy                   | Binary | 0.194               |                | 0.040               |                |
| Combination                   | Binary | -0.194              |                | -0.040              |                |

Contin: continuous variable; Binary: binary variable; ECOG PS, Eastern Cooperative Oncology Group Performance Status; PR, partial response; SD, stable disease; PD, progressive disease.

**A**

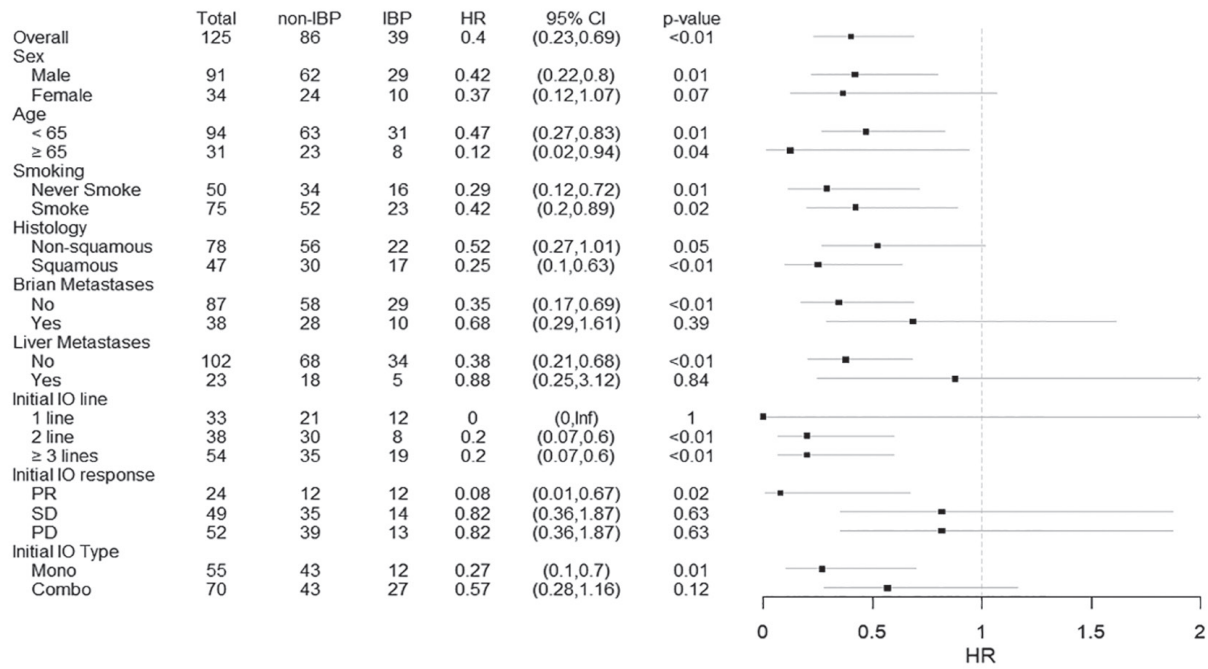

**B**

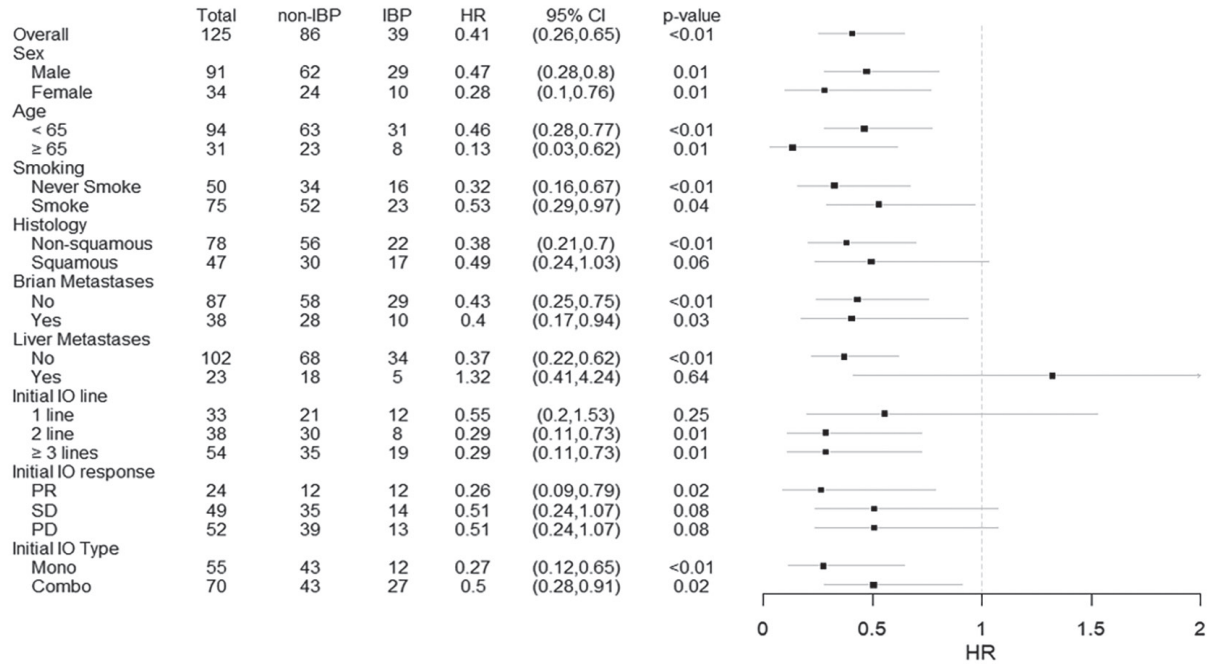

**Figure S1** Forest plots of PFS (A) and OS (B) in the IBP and non-IBP groups.

**A**

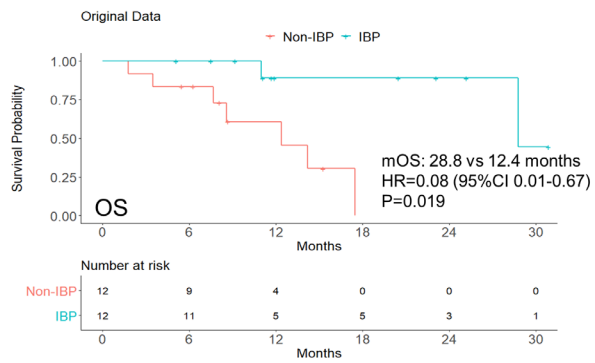

**B**

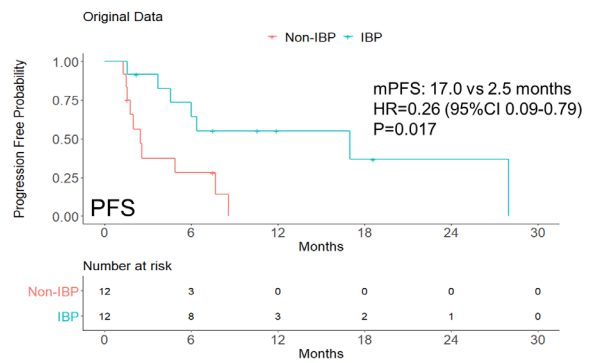

**Figure S2** Kaplan-Meier curves of OS (A) and PFS (B) from original data in the subgroup of patients who had PR as their best response to previous line.
